# Supplementary material for: Elimination of highly multidrug-resistant wound bacteria by the lactic acid bacterial drug candidate ILP100
Source: Research Square preprint supplement (doi:10.21203/rs.3.rs-5587281/v1), 2024-12-19
Supplement: Supplementary file 1 [file 6d625fa87c750c975d18ea98.docx]

**Supporting Information for**

**Elimination of highly multidrug-resistant wound bacteria by the lactic acid bacterial drug candidate ILP100**

**Supplementary Figures**


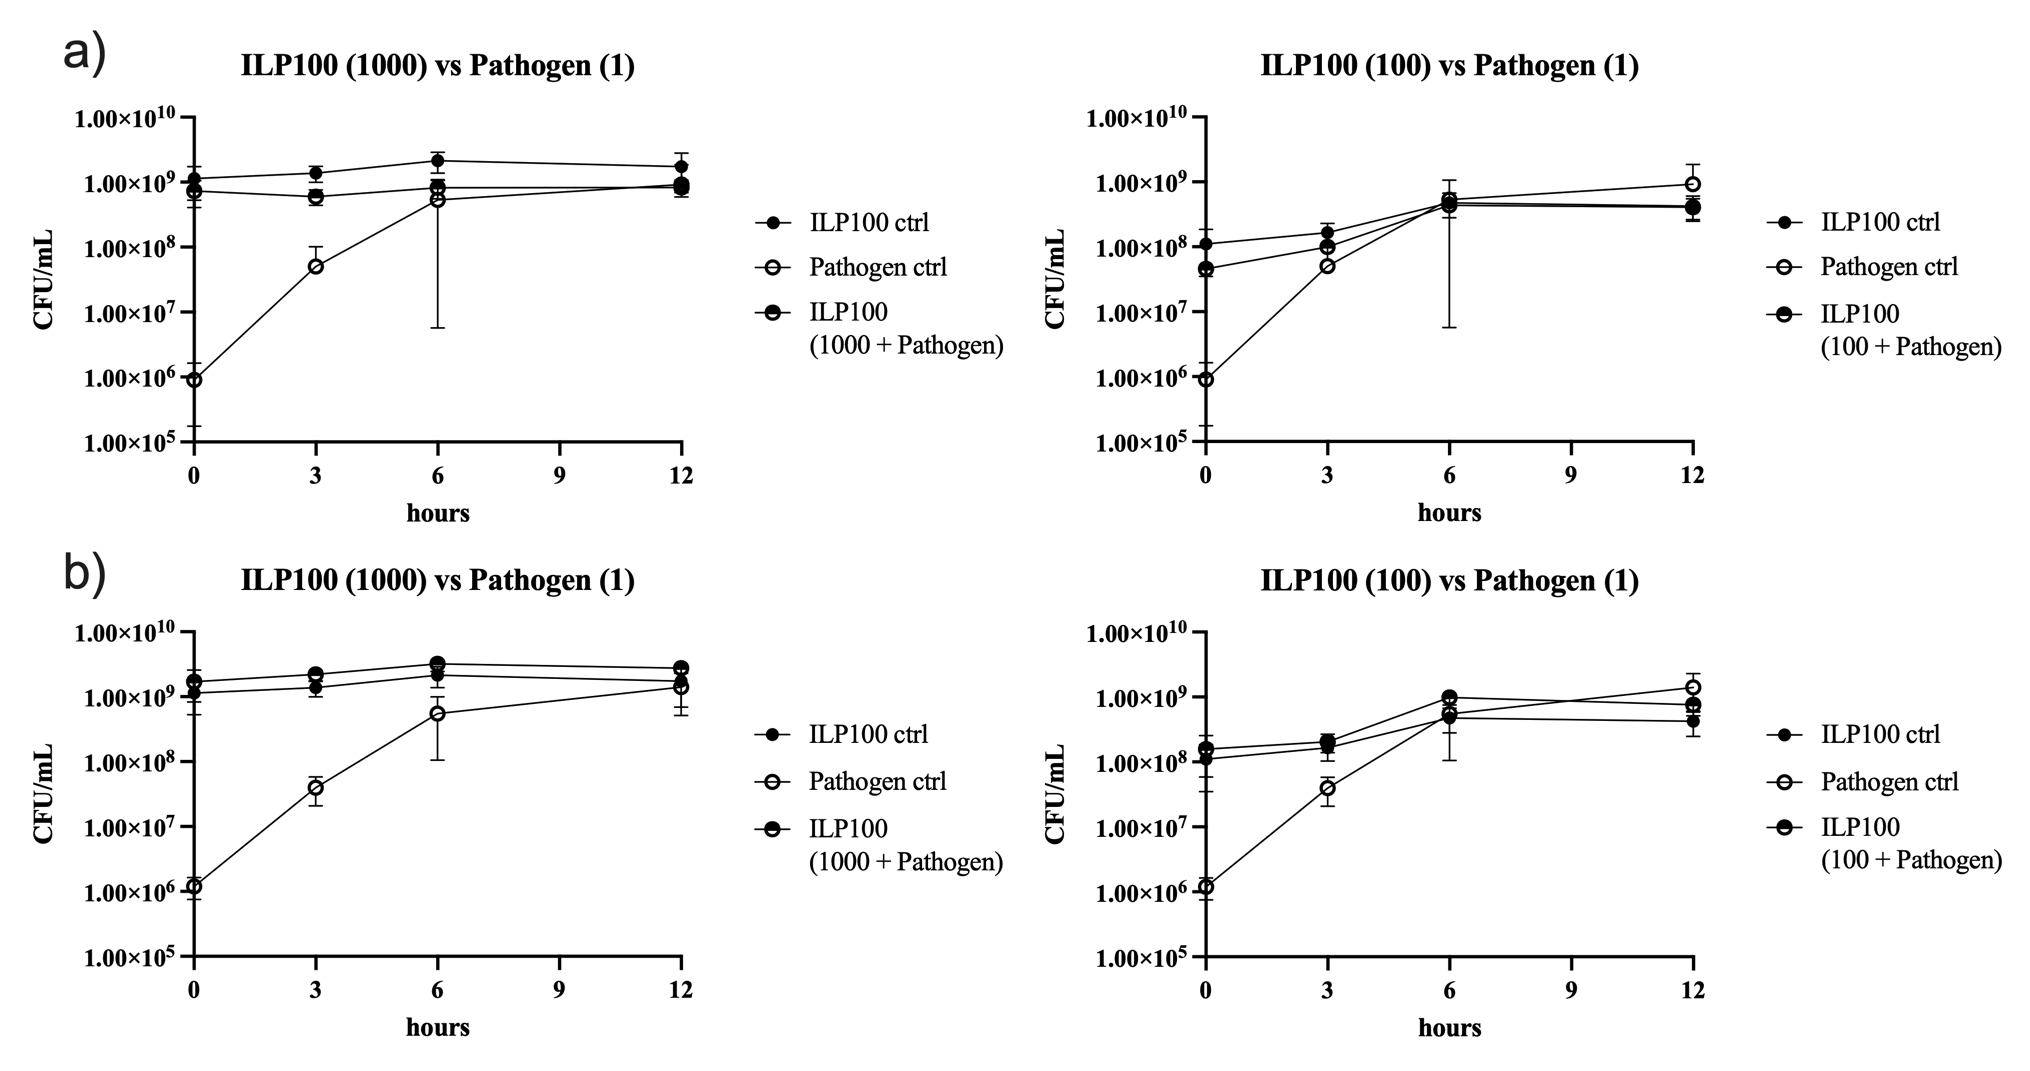


**Figure S1. Recovery of ILP100 in co-cultures and controlled monocultures.** The closed black circles represent ILP100’s capacity to grow in LSM broth. The half-open circles represent the ILP100 recovered from the co-cultures. The slow growth of ILP100 (both alone and in co-culture) indicates that it was not favored when compared against the pathogens. The open circles represent the pathogen average grown alone in LSM. Panel a) - non-MDR results. Panel b) - MDR results.

**Table S1.** Mean area of MDR pathogens cleared by **ILP100** at three different doses at 24h together with antibiotic discs (PTZ [piperacillin/tazobactam], CZA [ceftazidime/avibactam], MEV [meropenem]).

| **ILP100**  **Pathogen** | ILP100Low  5x106 CFU | ILP100Mid  5x107  CFU | ILP100High  1x108  CFU | ILP100Low  5x106  CFU | ILP100Mid  5x107 CFU | ILP100High  1x108 CFU | ILP100Low  5x106 CFU | ILP100Mid  5x107 CFU | ILP100High  1x108 CFU |
| --- | --- | --- | --- | --- | --- | --- | --- | --- | --- |
| *Pseudomonas aeruginosa* | Inoculum 1x106 CFU | | | Inoculum 1x105 CFU | | | Inoculum 1x104 CFU | | |
| KR6013 | 164 | 280 | 169 | 317 | 348 | 267 | 403 | 490 | 465 |
| KR6017 | 157 | 270 | 277 | 389 | 351 | 371 | 468 | NA | 509 |
| KR6101 | 194 | 256 | 350 | 289 | 395 | 444 | 484 | 474 | 501 |
| **Average** | **172** | **269** | **265** | **332** | **365** | **361** | **452** | **482** | **492** |
| *Enterobacter cloacae* | Inoculum 1x106 CFU | | | Inoculum 1x105 CFU | | | Inoculum 1x104 CFU | | |
| KR6106 | 304 | 279 | 436 | 465 | 475 | 438 | 407 | 484 | 414 |
| KR6023 | 350 | 311 | 214 | 420 | 330 | 479 | 403 | 511 | 343 |
| KR6049 | 306 | 286 | 470 | 431 | 281 | 403 | 419 | 376 | 452 |
| **Average** | **320** | **292** | **373** | **439** | **362** | **440** | **410** | **457** | **403** |
| *Acinetobacter baumannii* | Inoculum 1x106 CFU | | | Inoculum 1x105 CFU | | | Inoculum 1x104 CFU | | |
| KR6038 | 191 | 253 | 311 | 232 | 329 | 436 | 336 | 403 | 441 |
| KR6155 | 86 | 142 | 248 | 168 | 275 | 332 | 274 | 282 | 399 |
| KR6156 | 89 | 107 | 125 | 148 | 160 | 185 | 256 | 288 | 303 |
| **Average** | **122** | **167** | **228** | **183** | **255** | **318** | **289** | **324** | **381** |
| *Klebsiella pneumoniae* | Inoculum 1x106 CFU | | | Inoculum 1x105 CFU | | | Inoculum 1x104 CFU | | |
| KR6135 | 56 | 103 | 165 | 110 | 158 | 241 | 189 | 185 | 214 |
| KR6080 | 85 | 248 | 296 | 171 | 217 | 261 | 178 | 225 | 244 |
| KR6084 | 63 | 131 | 158 | 166 | 190 | 293 | 213 | 274 | 296 |
| **Average** | **68** | **161** | **206** | **149** | **188** | **265** | **193** | **228** | **251** |

**Table S2.** Mean area of non-MDR pathogens cleared by **ILP100** at 3 different doses at 24h without antibiotic discs on the plate.

| **ILP100**  **Pathogen** | ILP100 Low  5 x 106 CFU | ILP100 Mid  5 x 107 CFU | ILP100 High  1 x 108 CFU | ILP100 Low  5 x 106 CFU | ILP100 Mid  5 x 107 CFU | ILP100 High  1 x 108 CFU | ILP100 Low  5 x 106 CFU | ILP100 Mid  5 x 107 CFU | ILP100 High  1 x 108 CFU |
| --- | --- | --- | --- | --- | --- | --- | --- | --- | --- |
| *Pseudomonas aeruginosa* | Inoculum 1x106 CFU | | | Inoculum 1x105 CFU | | | Inoculum 1x104 CFU | | |
| KR6006 | 98.3 | 95.34 | 257.6 | 168.3 | 308.3 | 206.5 | 268.8 | 456.8 | 426.3 |
| KR6008 | 84.8 | 92.2 | 119.1 | 147.5 | 165 | 141.9 | 167.4 | 340.2 | 244.1 |
| KR6020 | 116 | 124.3 | 128.1 | 177.2 | 191.2 | 191.6 | 361.1 | 233.1 | 298.6 |
| KR6024 | 45.2 | 95.1 | 51.9 | 85.9 | 152.6 | 88.9 | 115.8 | 170 | 129 |
| KR6004 | 73.9 | 115.1 | 109.4 | 155.7 | 195.9 | 166.2 | 280.1 | 364.6 | 287.2 |
| **Average** | **83.6** | **104.4** | **133.2** | **146.9** | **202.6** | **159.0** | **238.6** | **312.9** | **277.0** |
| *Enterobacter cloacae* | Inoculum 1x106 CFU | | | Inoculum 1x105 CFU | | | Inoculum 1x104 CFU | | |
| KR6027 | 63.3 | 55.6 | 58.3 | 58.6 | 94.8 | 69.6 | 54.4 | 78.7 | 89.4 |
| KR6036 | 100.6 | 73.1 | 55.4 | 91.8 | 91.3 | 210.9 | 69 | 116.1 | 213.7 |
| KR6040 | 60.3 | 70.6 | 52.2 | 72.9 | 109.1 | 77 | 89.5 | 80.2 | 57.9 |
| KR6041 | 36.9 | 77.7 | 40.6 | 71.8 | 61.9 | 52 | 78.1 | NA | 54.4 |
| KR6088 | 76.8 | 100.4 | 118.8 | 196.3 | 110.2 | 142 | 114.4 | 153.3 | 124.4 |
| **Average** | **67.6** | **75.5** | **65.1** | **98.3** | **93.5** | **110.3** | **81.08** | **107.1** | **108.0** |
| *Acinetobacter baumannii* | Inoculum 1x106 CFU | | | Inoculum 1x105 CFU | | | Inoculum 1x104 CFU | | |
| KR6082 | 76.6 | 64 | 60.4 | 76 | 84.7 | 94.3 | 103.7 | 109.4 | 211.6 |
| KR6132 | 78.3 | 92.8 | 95.7 | 103.4 | 125.3 | 91 | 81.3 | 145.7 | 81.2 |
| KR6133 | 65.5 | 79.9 | 66 | 71.8 | 138.8 | 90.9 | 77.7 | 172.7 | 169.1 |
| KR6140 | 89 | 71 | 89.1 | 113.7 | NA | 120.3 | 203.6 | 206.9 | 99.4 |
| **Average** | **77.4** | **77.0** | **77.8** | **91.2** | **116.3** | **99.1** | **116.6** | **158.6** | **140.3** |
| *Proteus mirabilis* | Inoculum 1x106 CFU | | | Inoculum 1x105 CFU | | | Inoculum 1x104 CFU | | |
| KR6091 | 95.4 | 104.8 | 89.4 | 76.5 | 123.7 | 117.3 | 75 | 136.4 | 95.3 |
| *Klebsiella pneumoniae* | Inoculum 1x106 CFU | | | Inoculum 1x105 CFU | | | Inoculum 1x10^4 CFU | | |
| KR6165 | 41 | 64.6 | 35.2 | 79.5 | 62.7 | 37.3 | 50.3 | 76.5 | 39.7 |
| KR6100 | 204.6 | 272.6 | 231.3 | 288.3 | 281.8 | 281.4 | 256.2 | 293 | 229.7 |
| **Average** | **122.8** | **168.6** | **133.3** | **183.9** | **172.3** | **159.4** | **153.2** | **184.8** | **134.7** |
| *Staphylococcus aureus* | Inoculum 1x106 CFU | | | Inoculum 1x105 CFU | | | Inoculum 1x104 CFU | | |
| DA28823 | 66.2 | 81.6 | 67.3 | 65.1 | 87.2 | 86.8 | 92. 8 | NA | 96.9 |

**Table S3.** Mean area of MDR pathogens cleared by **ILP100** Mid Dose (5x107) at 24 hourswithout antibiotic discs on the plate.

| **ILP100**  **Pathogen** | ILP100Mid  5 x 107 CFU | ILP100Mid  5 x 107 CFU | ILP100Mid  5 x 107 CFU |
| --- | --- | --- | --- |
| *Pseudomonas aeruginosa* | Inoculum 1x106 CFU | Inoculum 1x105 CFU | Inoculum 1x104 CFU |
| KR6017 | 138 | 257 | 351 |
| KR6101 | 176 | 270 | 450 |
| **AVERAGE** | **157** | **264** | **401** |
| *Enterobacter cloacae* | Inoculum 1x106 CFU | Inoculum 1x105 CFU | Inoculum 1x104 CFU |
| KR6023 | 305 | 354 | 410 |
| KR6049 | 267 | 358 | 403 |
| **AVERAGE** | **286** | **356** | **407** |
| *Acinetobacter baumannii* | Inoculum 1x106 CFU | Inoculum 1x105 CFU | Inoculum 1x104 CFU |
| KR6038 | 189 | 295 | 345 |
| KR6155 | 264 | 286 | 423 |
| **AVERAGE** | **227** | **291** | **384** |
| *Klebsiella pneumoniae* | Inoculum 1x106 CFU | Inoculum 1x105 CFU | Inoculum 1x104 CFU |
| KR6080 | 218 | 256 | 361 |
| KR6084 | 207 | 245 | 286 |
| **AVERAGE** | **213** | **251** | **324** |
